# Supplementary material
Source: HighWire-hosted journal article supplement (https://srh.bmj.com/content/bmjsrh-2019-200568)
Supplement: inline-supplementary-material-1 [file inline-supplementary-material-1.pdf]

## Topic guide

|                                             |                                                                         |                                                                                                                           |                                                                                   |
|---------------------------------------------|-------------------------------------------------------------------------|---------------------------------------------------------------------------------------------------------------------------|-----------------------------------------------------------------------------------|
| <b>Reasons for choosing referral method</b> | How did you get referred to the CHOICES services?                       | <b>Self referral:</b> tell me about how you <u>chose</u> to self refer instead of going to your gp or another clinic?     |                                                                                   |
|                                             |                                                                         | Did you consider other methods?                                                                                           |                                                                                   |
|                                             |                                                                         | How did you find out about self referral?                                                                                 |                                                                                   |
| <b>Impact of using self referral</b>        | How did you find the process of self referring/getting referred by ___? | What did you think about self referral?                                                                                   |                                                                                   |
|                                             |                                                                         | <b>Other referral:</b> did you know you could self refer?                                                                 | <b>Yes:</b> how did you find out about self referral?                             |
|                                             |                                                                         |                                                                                                                           | What did you think about this service?                                            |
|                                             |                                                                         | How did you choose between these different methods of referral?                                                           |                                                                                   |
|                                             |                                                                         | <b>No:</b> self referral was introduced here last year. Patients can just call up themselves to make an appointment here. |                                                                                   |
|                                             |                                                                         | What do you think about this service?                                                                                     |                                                                                   |
|                                             |                                                                         | Which method of referral would you have chosen if you knew about self referral?                                           |                                                                                   |
|                                             |                                                                         | <b>Self referral:</b> what do you think was good about the service?                                                       | Do you think this service should be recommended for women requesting an abortion? |
|                                             |                                                                         | What could have made the process                                                                                          | Why?                                                                              |

|                                        |                                                                                  |                                                                                                                                              |  |
|----------------------------------------|----------------------------------------------------------------------------------|----------------------------------------------------------------------------------------------------------------------------------------------|--|
| <b>Barriers to using self referral</b> | How did it make a difference to your entire experience leading up to today?      | of getting an appointment easier/quicker?<br><br>Did you have any hesitation calling up for an appointment?                                  |  |
| <b>Areas of improvement</b>            |                                                                                  | <b>Other referral:</b> what would make you consider or prefer self referral?<br><br>Did you have any hesitation going to ___ for a referral? |  |
| <b>Ending the interview</b>            | Is there anything else regarding self referral/referral we haven't talked about? |                                                                                                                                              |  |

**Demographic information:** age
